# Supplementary material for: Geographic Divergence of Bovine and Human Shiga Toxin–Producing Escherichia coli O157:H7 Genotypes, New Zealand
Source: PubMed Central journal article supplement (PMC4257794; doi:10.3201/eid2012.140281), 2014-12
Supplement: 14-0281-Techapp-s1.pdf [file 14-0281-Techapp-s1.pdf]

# Geographic Divergence of Bovine and Human Shiga Toxin–Producing *Escherichia coli* O157:H7 Genotypes, New Zealand

## Technical Appendix

Technical Appendix Figure 1 (below and following pages). PFGE profile comparison of 363 human Shiga toxin–producing *Escherichia coli* O157:H7 isolates using UPGMA cluster analysis (Dice similarity coefficient, 1% band matching tolerance). Virulence genes (*stx1*, *stx2a/2c*, *stx2c*, *eae*, *ehxA*) present (1) or absent (0). Island of origin (Origin) presented as North Island (NI) or South Island (SI) of New Zealand, and genotypes of isolates as Shiga toxin (Stx)-encoding bacteriophage insertion (SBI) types.

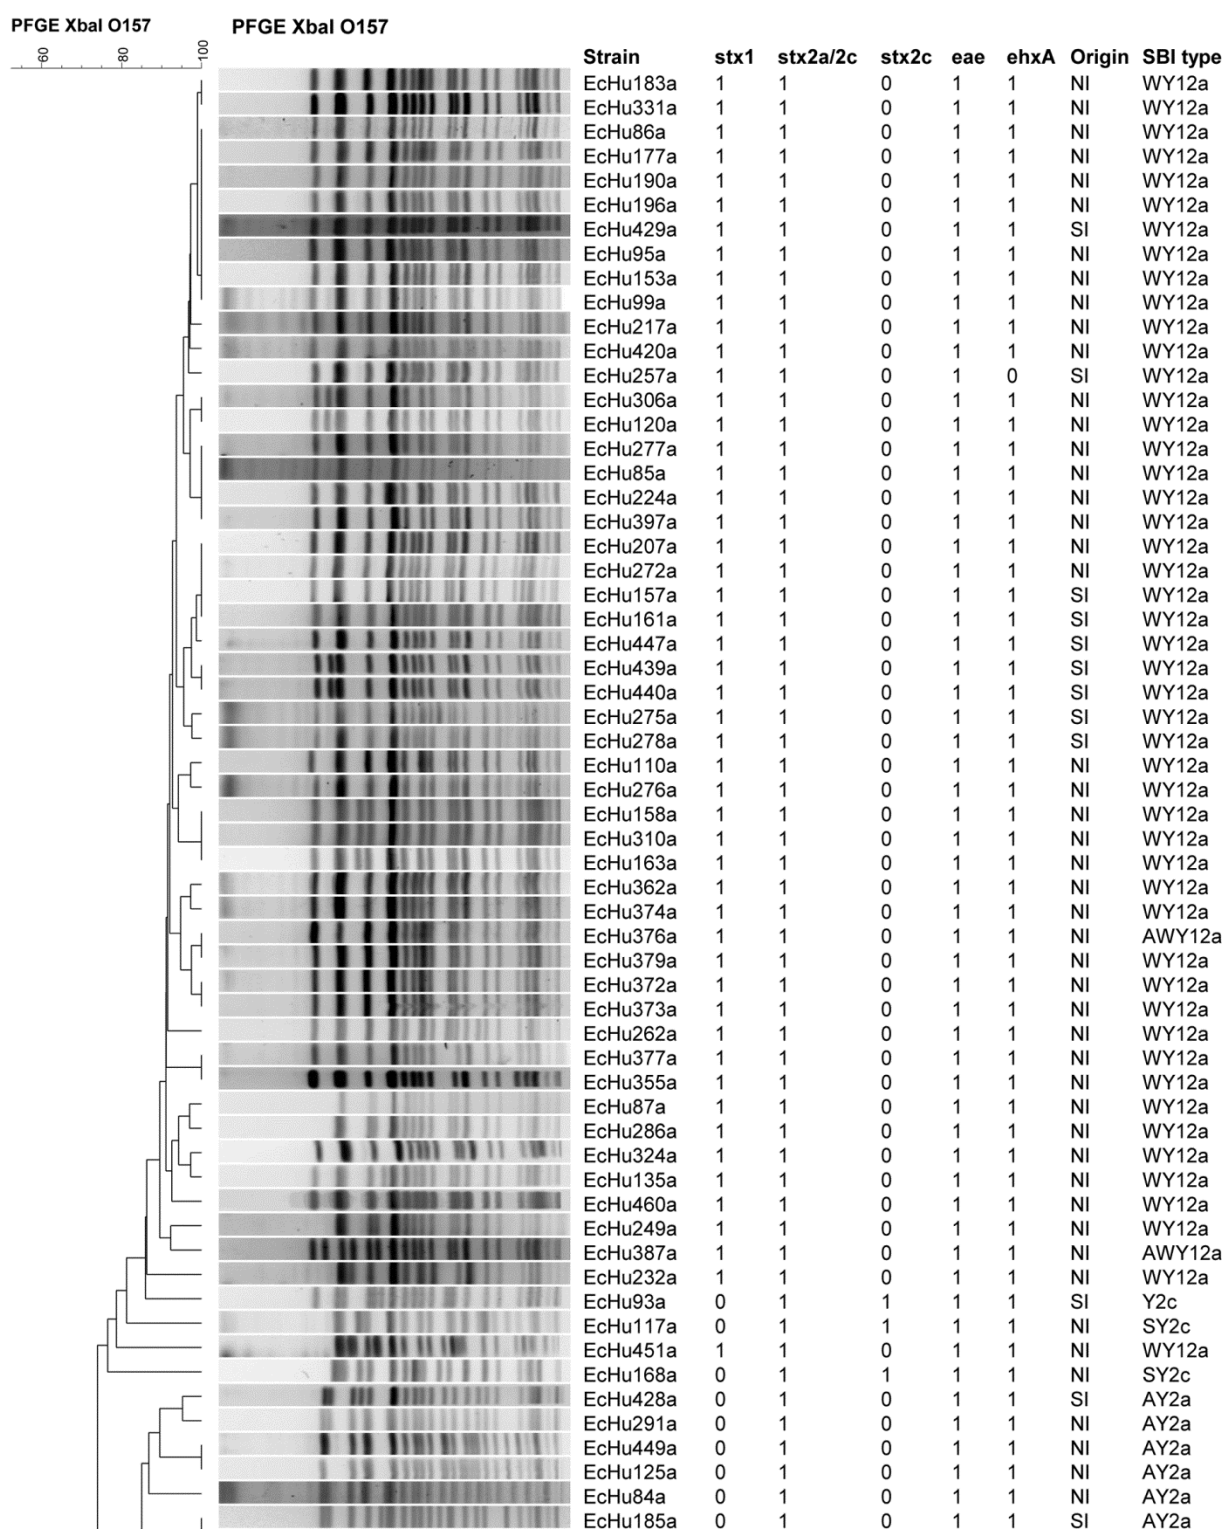



|          |   |   |   |   |   |    |       |
|----------|---|---|---|---|---|----|-------|
| EcHu330a | 0 | 1 | 0 | 1 | 1 | NI | AY2a  |
| EcHu333a | 0 | 1 | 0 | 1 | 1 | NI | AY2a  |
| EcHu417a | 0 | 1 | 0 | 1 | 1 | NI | AY2a  |
| EcHu441a | 0 | 1 | 0 | 1 | 1 | NI | AY2a  |
| EcHu442a | 0 | 1 | 0 | 1 | 1 | NI | AY2a  |
| EcHu294a | 0 | 1 | 0 | 1 | 1 | NI | AY2a  |
| EcHu270a | 0 | 1 | 0 | 1 | 1 | NI | AY2a  |
| EcHu261a | 0 | 1 | 0 | 1 | 1 | NI | AY2a  |
| EcHu285a | 0 | 1 | 0 | 1 | 1 | NI | AY2a  |
| EcHu298a | 0 | 1 | 0 | 1 | 1 | NI | AY2a  |
| EcHu401a | 0 | 1 | 0 | 1 | 1 | NI | AY2a  |
| EcHu181a | 0 | 1 | 0 | 1 | 1 | NI | AY2a  |
| EcHu357a | 0 | 1 | 0 | 1 | 1 | NI | AY2a  |
| EcHu358a | 0 | 1 | 0 | 1 | 1 | SI | AY2a  |
| EcHu131a | 0 | 1 | 0 | 1 | 1 | SI | AY2a  |
| EcHu408a | 0 | 1 | 0 | 1 | 1 | NI | AY2a  |
| EcHu325a | 0 | 1 | 0 | 1 | 1 | NI | AY2a  |
| EcHu274a | 0 | 1 | 0 | 1 | 1 | NI | AY2a  |
| EcHu202a | 0 | 1 | 0 | 1 | 1 | NI | AY2a  |
| EcHu203a | 0 | 1 | 0 | 1 | 1 | NI | AY2a  |
| EcHu200a | 0 | 1 | 0 | 1 | 1 | NI | AY2a  |
| EcHu231a | 0 | 1 | 0 | 1 | 1 | NI | AY2a  |
| EcHu150a | 0 | 1 | 0 | 1 | 1 | NI | AY2a  |
| EcHu233a | 0 | 1 | 0 | 1 | 1 | SI | AY2a  |
| EcHu205a | 0 | 1 | 0 | 1 | 1 | NI | AY2a  |
| EcHu384a | 0 | 1 | 0 | 1 | 1 | SI | AY2a  |
| EcHu419a | 0 | 1 | 0 | 1 | 1 | NI | AY2a  |
| EcHu353a | 0 | 1 | 0 | 1 | 1 | NI | AY2a  |
| EcHu380a | 0 | 1 | 0 | 1 | 1 | NI | AY2a  |
| EcHu383a | 0 | 1 | 0 | 1 | 1 | SI | AY2a  |
| EcHu434a | 0 | 1 | 0 | 1 | 1 | SI | AY2a  |
| EcHu448a | 0 | 1 | 0 | 1 | 1 | NI | AY2a  |
| EcHu269a | 0 | 1 | 0 | 1 | 1 | SI | AY2a  |
| EcHu104a | 0 | 1 | 0 | 1 | 1 | NI | AY2a  |
| EcHu118a | 0 | 1 | 0 | 1 | 1 | NI | AY2a  |
| EcHu128a | 0 | 1 | 0 | 1 | 1 | NI | AY2a  |
| EcHu214a | 0 | 1 | 0 | 1 | 1 | NI | AY2a  |
| EcHu218a | 0 | 1 | 0 | 1 | 1 | NI | AY2a  |
| EcHu226a | 0 | 1 | 0 | 1 | 1 | NI | AY2a  |
| EcHu228a | 0 | 1 | 0 | 1 | 1 | NI | AY2a  |
| EcHu241a | 0 | 1 | 0 | 1 | 1 | NI | AWY2a |
| EcHu244a | 0 | 1 | 0 | 1 | 1 | NI | AY2a  |
| EcHu256a | 0 | 1 | 0 | 1 | 1 | NI | AY2a  |
| EcHu316a | 0 | 1 | 0 | 1 | 1 | NI | AY2a  |
| EcHu184a | 0 | 1 | 0 | 1 | 1 | NI | AY2a  |
| EcHu334a | 0 | 1 | 0 | 1 | 1 | NI | AY2a  |
| EcHu390a | 0 | 1 | 0 | 1 | 1 | NI | AY2a  |
| EcHu391a | 0 | 1 | 0 | 1 | 1 | SI | AY2a  |
| EcHu392a | 0 | 1 | 0 | 1 | 1 | SI | AY2a  |
| EcHu395a | 0 | 1 | 0 | 1 | 1 | SI | AY2a  |
| EcHu422a | 0 | 1 | 0 | 1 | 1 | NI | AY2a  |
| EcHu352a | 0 | 1 | 0 | 1 | 1 | NI | AY2a  |
| EcHu446a | 0 | 1 | 0 | 1 | 1 | NI | AY2a  |
| EcHu98a  | 0 | 1 | 0 | 1 | 1 | NI | AY2a  |
| EcHu100a | 0 | 1 | 0 | 1 | 1 | SI | AY2a  |
| EcHu264a | 0 | 1 | 0 | 1 | 1 | NI | AY2a  |
| EcHu284a | 0 | 1 | 0 | 1 | 1 | NI | AY2a  |
| EcHu290a | 0 | 1 | 0 | 1 | 1 | NI | AY2a  |
| EcHu292a | 0 | 1 | 0 | 1 | 1 | SI | AY2a  |
| EcHu113a | 0 | 1 | 0 | 1 | 1 | NI | AY2a  |
| EcHu116a | 0 | 1 | 0 | 1 | 1 | NI | AY2a  |
| EcHu136a | 0 | 1 | 0 | 1 | 1 | NI | AY2a  |
| EcHu137a | 0 | 1 | 0 | 1 | 1 | SI | AY2a  |
| EcHu160a | 0 | 1 | 0 | 1 | 1 | NI | AY2a  |
| EcHu164a | 0 | 1 | 0 | 1 | 1 | NI | AY2a  |
| EcHu356a | 0 | 1 | 0 | 1 | 1 | NI | AY2a  |
| EcHu103a | 0 | 1 | 0 | 1 | 1 | NI | AY2a  |
| EcHu194a | 0 | 1 | 0 | 1 | 1 | SI | AY2a  |
| EcHu361a | 0 | 1 | 0 | 1 | 1 | SI | AY2a  |
| EcHu371a | 0 | 1 | 0 | 1 | 1 | NI | AY2a  |
| EcHu126a | 0 | 1 | 0 | 1 | 1 | NI | AY2a  |
| EcHu370a | 0 | 1 | 0 | 1 | 1 | SI | AY2a  |
| EcHu421a | 0 | 1 | 0 | 1 | 1 | NI | AY2a  |
| EcHu88a  | 0 | 1 | 0 | 1 | 1 | NI | AY2a  |
| EcHu176a | 0 | 1 | 0 | 1 | 1 | NI | AY2a  |
| EcHu179a | 0 | 1 | 0 | 1 | 1 | SI | AY2a  |
| EcHu129a | 0 | 1 | 0 | 1 | 1 | SI | AY2a  |
| EcHu171a | 0 | 1 | 0 | 1 | 1 | NI | AY2a  |
| EcHu172a | 0 | 1 | 0 | 1 | 1 | NI | AY2a  |
| EcHu173a | 0 | 1 | 0 | 1 | 1 | NI | AY2a  |
| EcHu147a | 0 | 1 | 0 | 1 | 1 | NI | AY2a  |
| EcHu400a | 0 | 1 | 0 | 1 | 1 | NI | AY2a  |
| EcHu405a | 0 | 1 | 0 | 1 | 1 | NI | AY2a  |
| EcHu197a | 0 | 1 | 0 | 1 | 1 | NI | AY2a  |
| EcHu255a | 0 | 1 | 0 | 1 | 1 | NI | AY2a  |
| EcHu317a | 0 | 1 | 0 | 1 | 1 | NI | AY2a  |
| EcHu247a | 0 | 1 | 0 | 1 | 1 | NI | AY2a  |
| EcHu188a | 0 | 1 | 0 | 1 | 1 | NI | AY2a  |
| EcHu339a | 0 | 1 | 0 | 1 | 1 | NI | AY2a  |
| EcHu404a | 0 | 1 | 0 | 1 | 1 | NI | AY2a  |
| EcHu423a | 0 | 1 | 0 | 1 | 1 | NI | AY2a  |
| EcHu427a | 0 | 1 | 0 | 1 | 1 | NI | AY2a  |
| EcHu348a | 0 | 1 | 0 | 1 | 1 | NI | AY2a  |
| EcHu349a | 0 | 1 | 0 | 1 | 1 | NI | AY2a  |

|          |   |   |   |   |   |    |       |
|----------|---|---|---|---|---|----|-------|
| EcHu382a | 0 | 1 | 0 | 1 | 1 | NI | AY2a  |
| EcHu436a | 0 | 1 | 0 | 1 | 1 | SI | AY2a  |
| EcHu443a | 0 | 1 | 0 | 1 | 1 | NI | AY2a  |
| EcHu445a | 0 | 1 | 0 | 1 | 1 | NI | AY2a  |
| EcHu455a | 0 | 1 | 0 | 1 | 1 | NI | AY2a  |
| EcHu267a | 0 | 1 | 0 | 1 | 1 | NI | AY2a  |
| EcHu111a | 0 | 1 | 0 | 1 | 1 | NI | AY2a  |
| EcHu119a | 0 | 1 | 0 | 1 | 1 | NI | AY2a  |
| EcHu305a | 0 | 1 | 0 | 1 | 1 | NI | AY2a  |
| EcHu307a | 0 | 1 | 0 | 1 | 1 | NI | AY2a  |
| EcHu138a | 0 | 1 | 0 | 1 | 1 | NI | AY2a  |
| EcHu182a | 0 | 1 | 0 | 1 | 1 | NI | AY2a  |
| EcHu454a | 0 | 1 | 0 | 1 | 1 | NI | AY2a  |
| EcHu192a | 0 | 1 | 0 | 1 | 1 | NI | AY2a  |
| EcHu402a | 0 | 1 | 0 | 1 | 1 | NI | AY2a  |
| EcHu403a | 0 | 1 | 0 | 1 | 1 | NI | AY2a  |
| EcHu388a | 0 | 1 | 0 | 1 | 1 | NI | AY2a  |
| EcHu396a | 0 | 1 | 0 | 1 | 1 | NI | AY2a  |
| EcHu296a | 0 | 1 | 0 | 1 | 1 | SI | AY2a  |
| EcHu344a | 0 | 1 | 0 | 1 | 1 | NI | AY2a  |
| EcHu416a | 0 | 1 | 0 | 1 | 1 | NI | AY2a  |
| EcHu415a | 0 | 1 | 0 | 1 | 1 | NI | AY2a  |
| EcHu406a | 0 | 1 | 0 | 1 | 1 | NI | AY2a  |
| EcHu268a | 0 | 1 | 0 | 1 | 1 | NI | AY2a  |
| EcHu367a | 0 | 1 | 0 | 1 | 1 | NI | AY2a  |
| EcHu438a | 0 | 1 | 0 | 1 | 1 | NI | AY2a  |
| EcHu239a | 0 | 1 | 0 | 1 | 1 | SI | AY2a  |
| EcHu341a | 0 | 1 | 0 | 1 | 1 | NI | AY2a  |
| EcHu146a | 0 | 1 | 0 | 1 | 1 | SI | AY2a  |
| EcHu336a | 0 | 1 | 0 | 1 | 1 | NI | AY2a  |
| EcHu141a | 0 | 1 | 0 | 1 | 1 | NI | AY2a  |
| EcHu142a | 0 | 1 | 0 | 1 | 1 | NI | AY2a  |
| EcHu238a | 0 | 1 | 0 | 1 | 1 | NI | AY2a  |
| EcHu459a | 0 | 1 | 0 | 1 | 1 | NI | AY2a  |
| EcHu187a | 0 | 1 | 0 | 1 | 1 | NI | AY2a  |
| EcHu413a | 0 | 1 | 0 | 1 | 1 | NI | AY2a  |
| EcHu426a | 0 | 1 | 0 | 1 | 1 | NI | AY2a  |
| EcHu359a | 0 | 1 | 0 | 1 | 1 | NI | AY2a  |
| EcHu350a | 0 | 1 | 0 | 1 | 1 | NI | AY2a  |
| EcHu234a | 0 | 1 | 0 | 1 | 1 | SI | AY2a  |
| EcHu91a  | 0 | 1 | 0 | 1 | 1 | SI | AY2a  |
| EcHu193a | 0 | 1 | 0 | 1 | 1 | NI | AY2a  |
| EcHu144a | 0 | 1 | 0 | 1 | 1 | NI | AY2a  |
| EcHu206a | 0 | 1 | 0 | 1 | 1 | NI | AY2a  |
| EcHu149a | 0 | 1 | 0 | 1 | 1 | NI | AY2a  |
| EcHu201a | 0 | 1 | 0 | 1 | 1 | NI | AY2a  |
| EcHu389a | 0 | 1 | 0 | 1 | 1 | NI | AY2a  |
| EcHu302a | 0 | 1 | 0 | 1 | 1 | NI | AY2a  |
| EcHu155a | 0 | 1 | 0 | 1 | 1 | NI | AY2a  |
| EcHu127a | 0 | 1 | 0 | 1 | 1 | SI | AY2a  |
| EcHu410a | 0 | 1 | 0 | 1 | 1 | NI | AY2a  |
| EcHu315a | 0 | 1 | 0 | 1 | 1 | NI | AWY2a |
| EcHu189a | 0 | 1 | 0 | 1 | 1 | NI | AWY2a |
| EcHu386a | 0 | 1 | 0 | 1 | 1 | NI | AY2a  |
| EcHu289a | 0 | 1 | 0 | 1 | 1 | SI | AY2a  |
| EcHu326a | 0 | 1 | 0 | 1 | 1 | NI | AY2a  |
| EcHu411a | 0 | 1 | 0 | 1 | 1 | NI | AY2a  |
| EcHu412a | 0 | 1 | 0 | 1 | 1 | NI | AY2a  |
| EcHu122a | 0 | 1 | 0 | 1 | 1 | NI | AY2a  |
| EcHu385a | 0 | 1 | 0 | 1 | 1 | SI | AY2a  |
| EcHu407a | 0 | 1 | 0 | 1 | 1 | NI | AY2a  |
| EcHu354a | 0 | 1 | 0 | 1 | 1 | SI | AY2a  |
| EcHu204a | 0 | 1 | 0 | 1 | 1 | SI | AY2a  |
| EcHu457a | 0 | 1 | 0 | 1 | 1 | SI | AY2a  |
| EcHu297a | 0 | 1 | 0 | 1 | 1 | NI | AY2a  |
| EcHu283a | 0 | 1 | 0 | 1 | 1 | NI | AY2a  |
| EcHu223a | 0 | 1 | 0 | 1 | 1 | NI | AY2a  |
| EcHu398a | 0 | 1 | 0 | 1 | 1 | NI | AY2a  |
| EcHu213a | 0 | 1 | 0 | 1 | 1 | NI | AY2a  |
| EcHu265a | 0 | 1 | 0 | 1 | 1 | NI | AY2a  |
| EcHu308a | 0 | 1 | 0 | 1 | 1 | NI | AY2a  |
| EcHu343a | 0 | 1 | 0 | 1 | 1 | SI | AY2a  |
| EcHu134a | 0 | 1 | 0 | 1 | 1 | NI | AY2a  |
| EcHu225a | 0 | 1 | 0 | 1 | 1 | NI | AY2a  |
| EcHu444a | 0 | 1 | 0 | 1 | 1 | NI | AY2a  |
| EcHu327a | 0 | 1 | 0 | 1 | 1 | NI | AY2a  |
| EcHu329a | 0 | 1 | 0 | 1 | 1 | NI | AY2a  |
| EcHu368a | 0 | 1 | 0 | 1 | 1 | SI | AY2a  |
| EcHu253a | 0 | 1 | 0 | 1 | 1 | NI | AY2a  |
| EcHu191a | 0 | 1 | 0 | 1 | 1 | NI | AY2a  |
| EcHu263a | 0 | 1 | 0 | 1 | 1 | NI | AWY2a |
| EcHu450a | 0 | 1 | 0 | 1 | 1 | NI | AY2a  |
| EcHu431a | 0 | 1 | 0 | 1 | 1 | NI | AY2a  |
| EcHu151a | 0 | 1 | 0 | 1 | 1 | NI | AY2a  |
| EcHu212a | 0 | 1 | 0 | 1 | 1 | NI | AY2a  |
| EcHu347a | 0 | 1 | 0 | 1 | 1 | NI | AY2a  |
| EcHu159a | 0 | 1 | 0 | 1 | 1 | NI | AY2a  |
| EcHu167a | 0 | 1 | 0 | 1 | 1 | NI | AY2a  |
| EcHu393a | 0 | 1 | 0 | 1 | 1 | NI | AY2a  |
| EcHu394a | 0 | 1 | 0 | 1 | 1 | NI | AY2a  |
| EcHu452a | 0 | 1 | 0 | 1 | 1 | NI | AY2a  |
| EcHu266a | 0 | 1 | 0 | 1 | 1 | NI | AY2a  |
| EcHu287a | 0 | 1 | 0 | 1 | 1 | SI | AY2a  |
| EcHu96a  | 0 | 1 | 0 | 1 | 1 | NI | AY2a  |

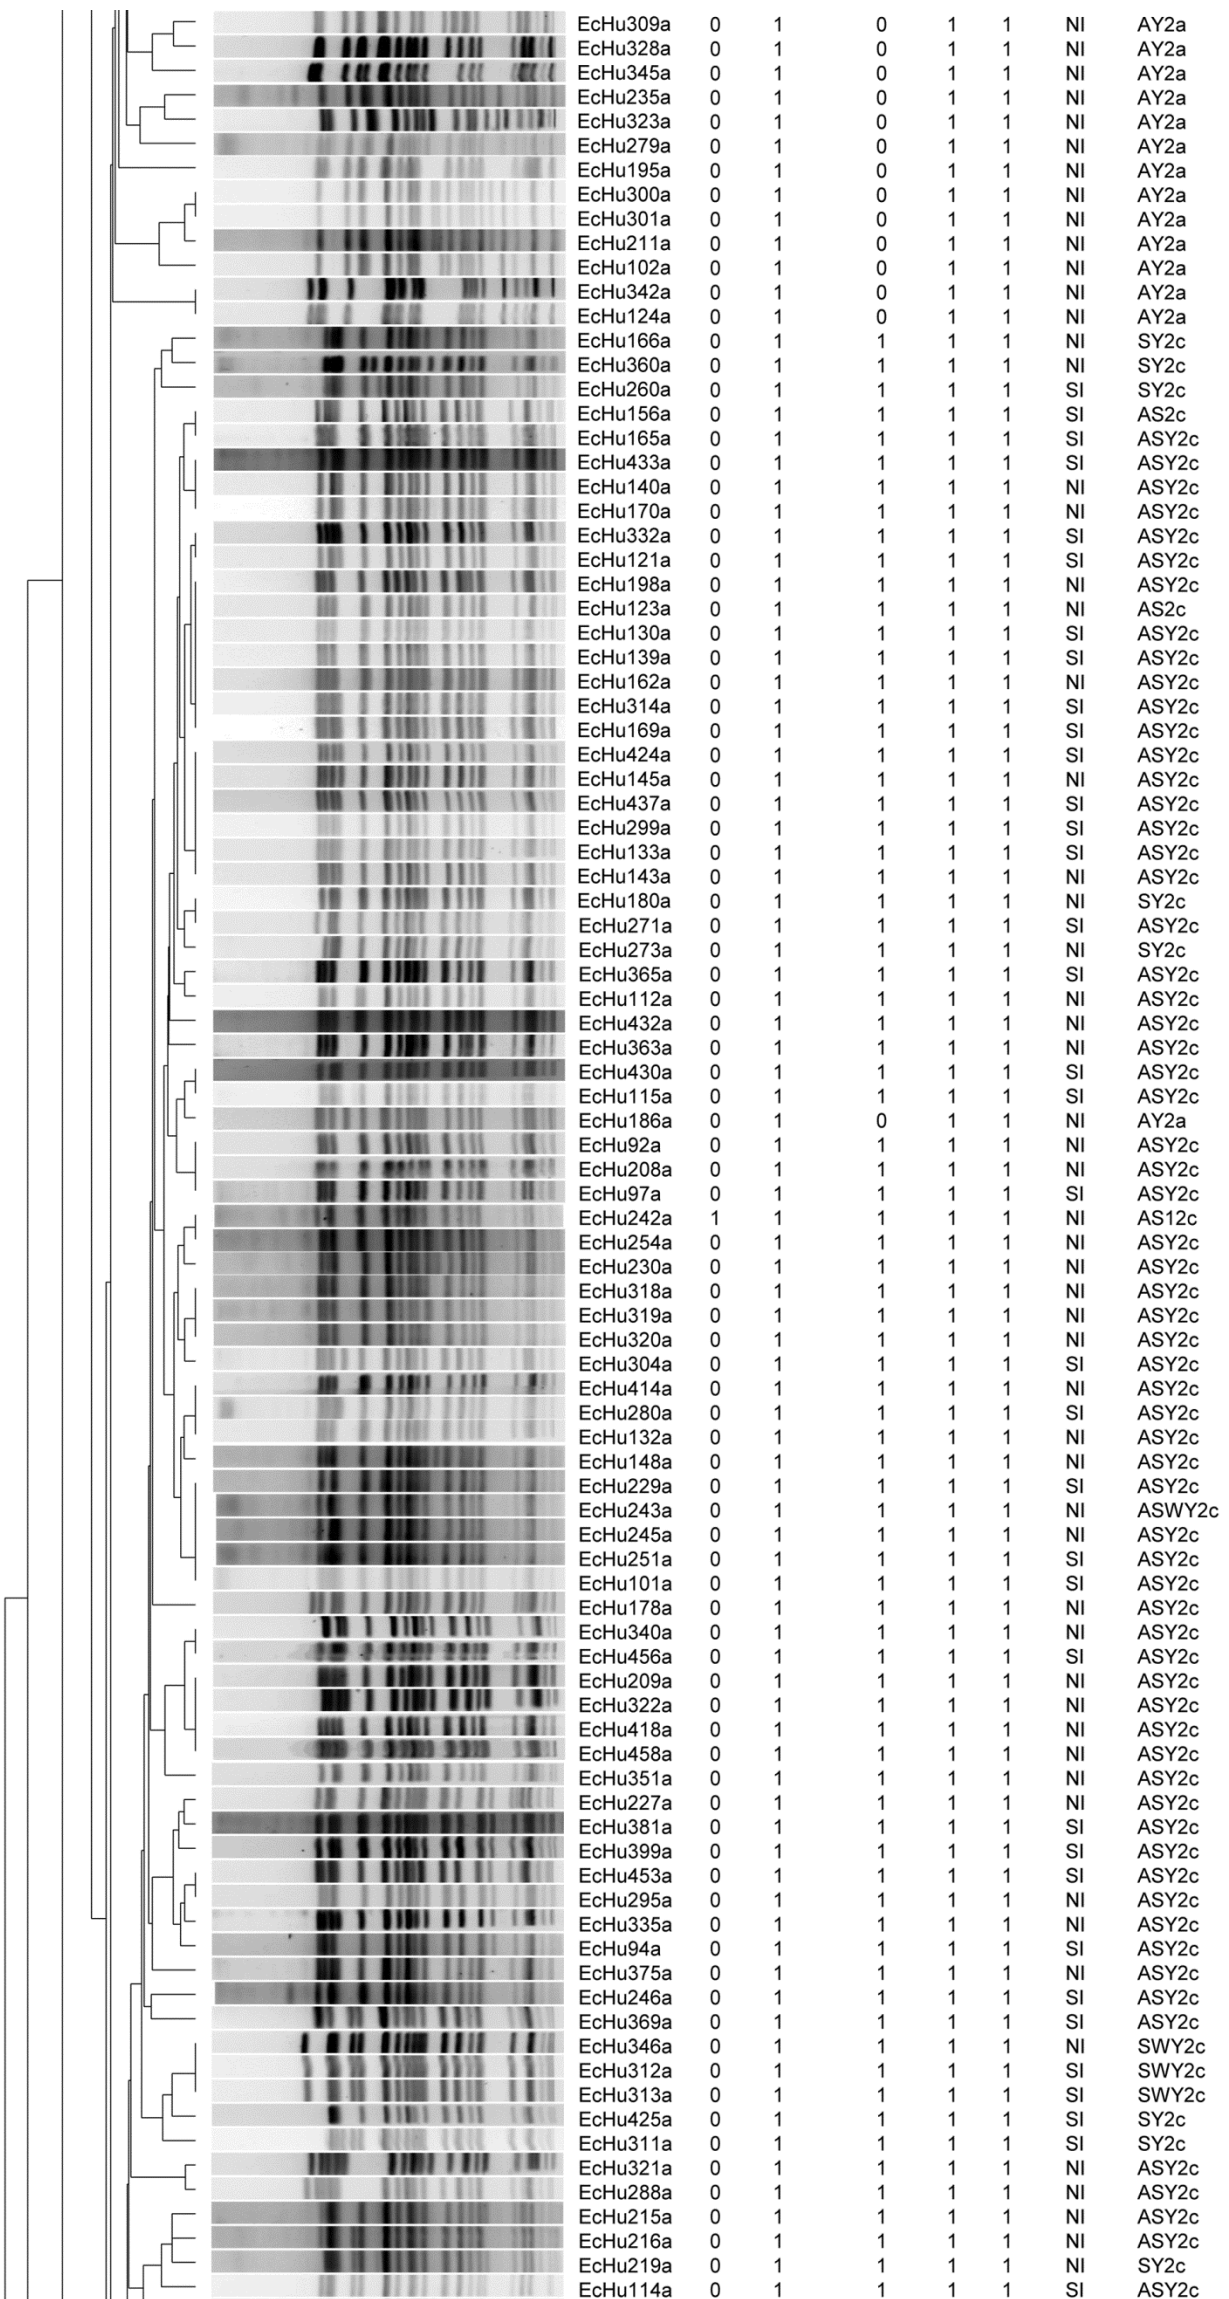

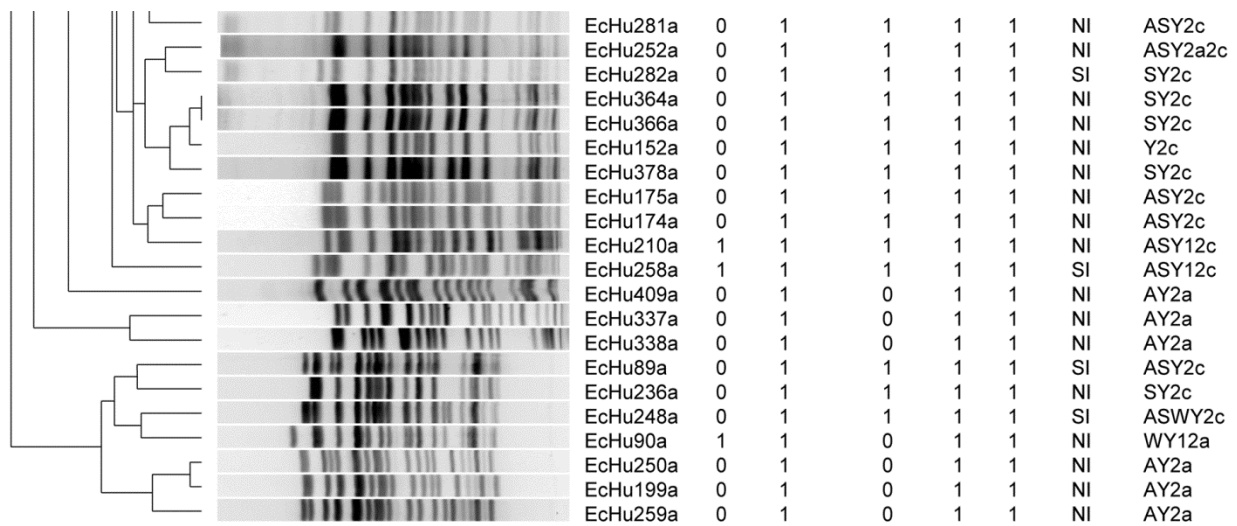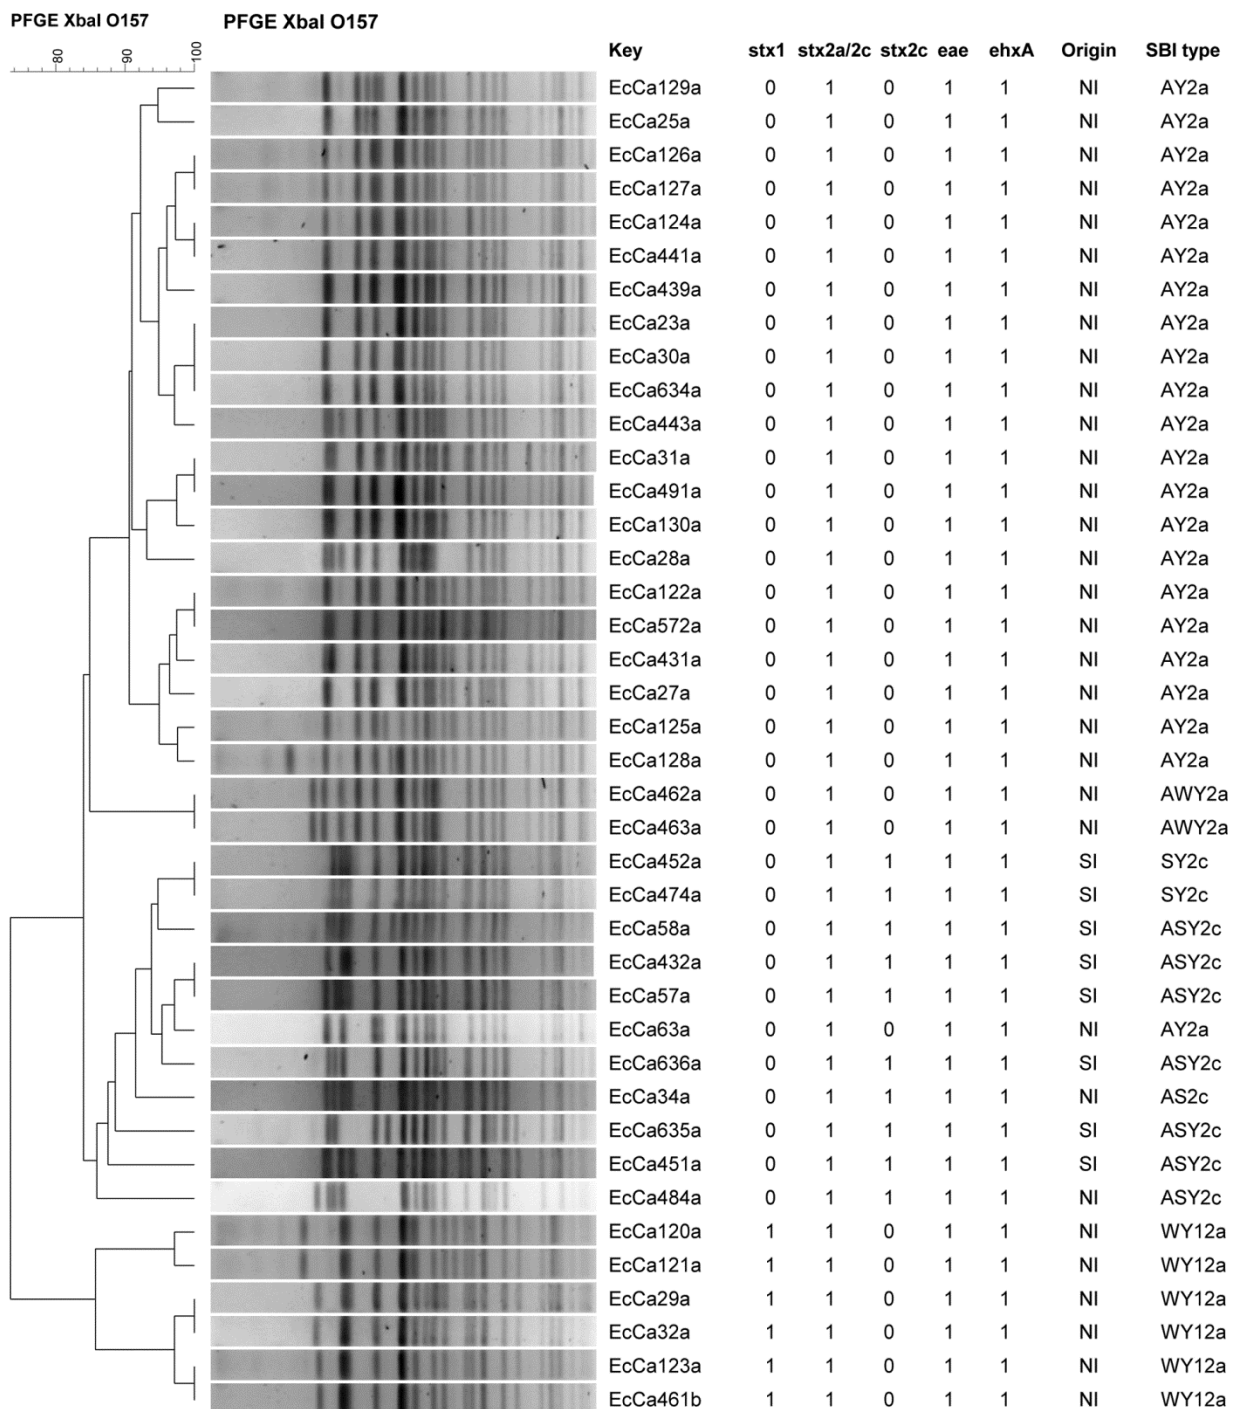

Technical Appendix Figure 2. PFGE profile comparison of 40 bovine Shiga toxin-producing *Escherichia coli* O157:H7 isolates using UPGMA cluster analysis (Dice similarity coefficient, 1% band matching tolerance). Virulence genes (*stx1*, *stx2a/2c*, *stx2c*, *eae*, *ehxA*) present (1) or absent (0). Island of origin (Origin) presented as North Island (NI) or South Island (SI) of New Zealand, and genotypes of isolates as Shiga toxin-encoding bacteriophage insertion (SBI) types.

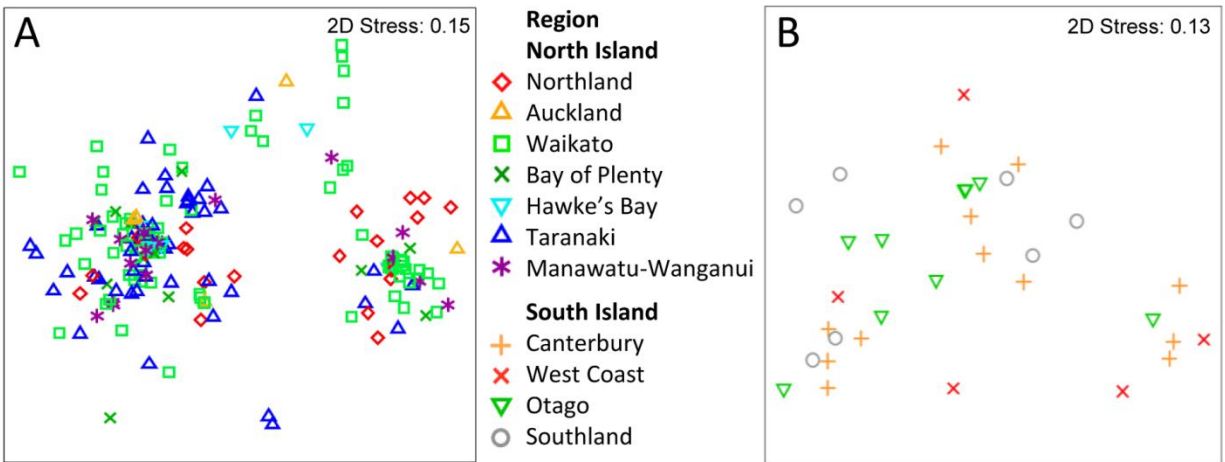

Technical Appendix Figure 3. Multidimensional scaling plots showing the genotypic clustering of bovine meat Shiga toxin-producing *Escherichia coli* O157:H7 isolates originating from the North Island (n = 200, 1 isolate excluded) and South Island (n = 33, 1 isolate excluded) of New Zealand. The plots were determined on the basis of the isolates' pulsed-field gel electrophoresis profiles. Clusters associated with regions are presented for isolates from the North Island (A) and the South Island (B).

|                     | NZ Cattle   | NZ Human    | AU Cattle   | AU Human    | US Cattle   | US Human    |
|---------------------|-------------|-------------|-------------|-------------|-------------|-------------|
| NZ Cattle (n = 40)  |             | 0.74 – 0.93 | 0.00 – 0.13 | 0.04 – 0.20 | 0.16 – 0.41 | 0.18 – 0.41 |
| NZ Human (n = 363)  | <b>0.92</b> |             | 0.04 – 0.09 | 0.06 – 0.18 | 0.21 – 0.33 | 0.23 – 0.34 |
| AU Cattle (n = 205) | 0.06        | 0.06        |             | 0.57 – 0.79 | 0.27 – 0.43 | 0.05 – 0.13 |
| AU Human (n = 79)   | 0.11        | 0.12        | <b>0.69</b> |             | 0.24 – 0.44 | 0.08 – 0.21 |
| US Cattle (n = 143) | 0.28        | 0.27        | 0.35        | 0.35        |             | 0.51 – 0.69 |
| US Human (n = 179)  | 0.30        | 0.29        | 0.09        | 0.15        | <b>0.61</b> |             |

Technical Appendix Figure 4. Proportional similarity index (PSI) values assessing the similarity of frequency distributions of Shiga toxin-encoding bacteriophage insertion (SBI) types among human and bovine Shiga toxin-producing *Escherichia coli* O157:H7 isolates originating from New Zealand (NZ), Australia (AU), and the United States (US). PSI values are presented in the lower half of the matrix with corresponding bootstrapped 95% confidence intervals in the upper half. Increased font size of PSI value shows higher degree of similarity.
